# Supplementary material for: Autologous Umbilical Cord Blood Transfusion in Young Children With Type 1 Diabetes Fails to Preserve C-Peptide
Source: Oxford University Press journal article supplement (doi:10.2337/dc11-1406), 2011-10-20

SUPPLEMENTARY DATA

**Supplementary Figure 1.** AUC C-Peptide Declines Following Autologous UCB Infusion. Median and interquartile range AUC C-Peptide are shown at baseline and all time-points post UCB infusion.

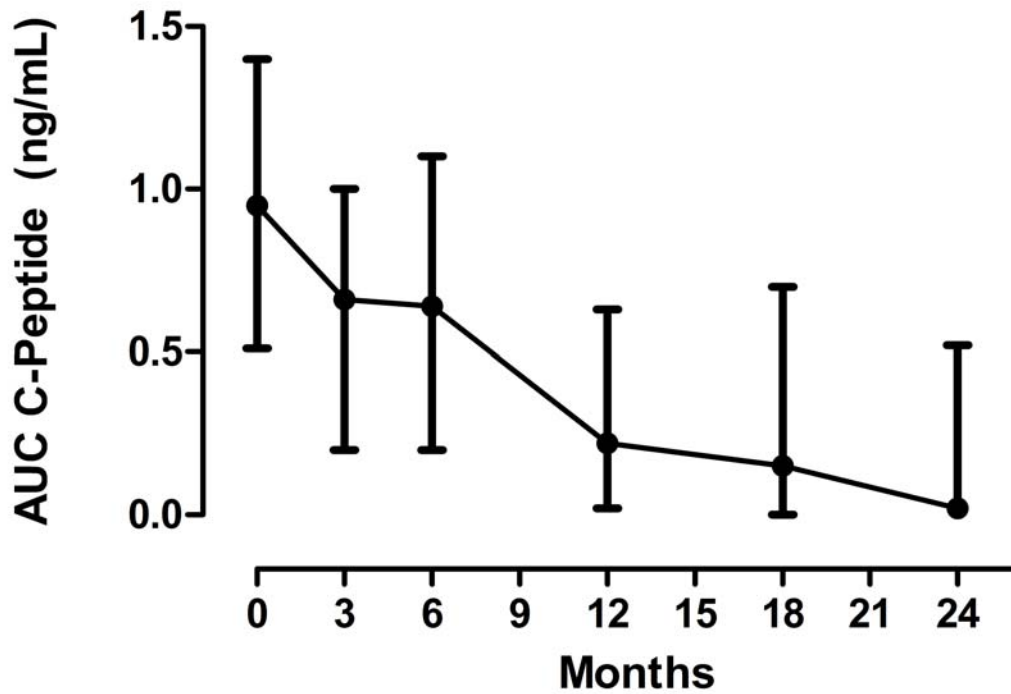

Supplement: dc111406supplementarydata.pdf [file dc111406supplementarydata.pdf]
